# Supplementary material for: Silver Nanoparticle-Based Sensor for the Selective Detection of Nickel Ions
Source: MDPI journal article supplement (doi:10.3390/nano11071733), 2021-06-30
Supplement: s1 [file s1]

## SUPPLEMENTARY MATERIALS

# Silver Nanoparticle-Based Sensor for the Selective Detection of Nickel Ions

Andrea Rossi <sup>1</sup>, Marco Zannotti <sup>1</sup>, Massimiliano Cuccioloni<sup>2</sup>, Marco Minicucci <sup>3</sup>, Laura Petetta <sup>1</sup>, Mauro Angeletti <sup>2,\*</sup> and Rita Giovannetti <sup>2,\*</sup>

<sup>1</sup> School of Science and Technology, Chemistry Division, University of Camerino, 62032 Camerino, Italy; andrea.rossi@unicam.it (A.R.); marco.zannotti@unicam.it (M.Z.); laura.petetta@unicam.it (L.P.)

<sup>2</sup> School of Biosciences and Veterinary Medicine, 62032 Camerino (MC), Italy; massimiliano.cuccioloni@unicam.it (M.C.)

<sup>3</sup> School of Science and Technology, Physics Division, University of Camerino, 62032 Camerino, Italy; marco.minicucci@unicam.it (M.M.)

\* rita.giovannetti@unicam.it (R.G.); mauro.angeletti@unicam.it (M.A.)

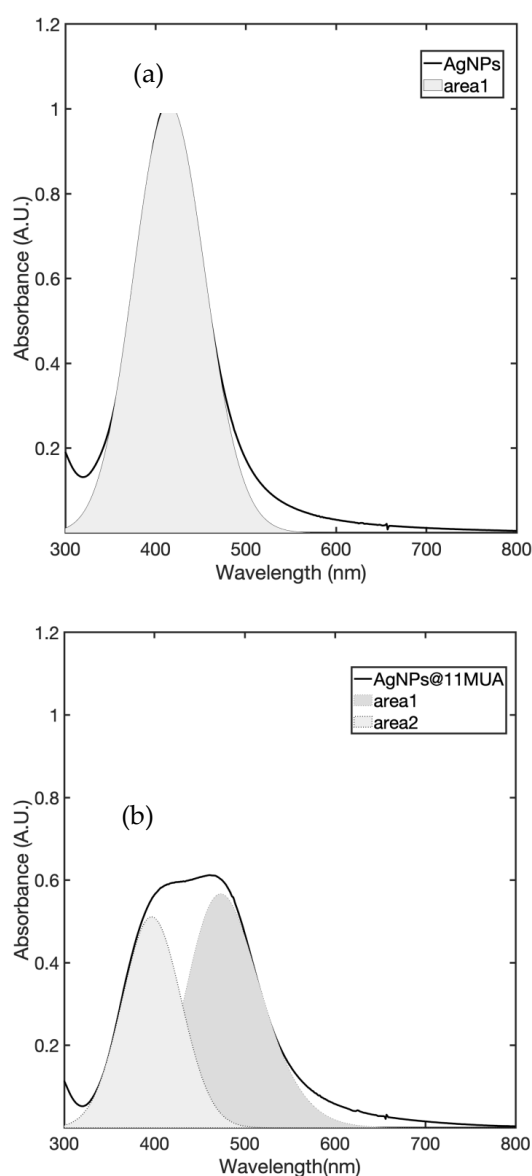

**Figure S1.** UV-VIS signal deconvolution of (a) AgNPs@11MUA and (b) AgNPs@11MUA after addition of 7.5 μM of Ni<sup>2+</sup> using FityK software.

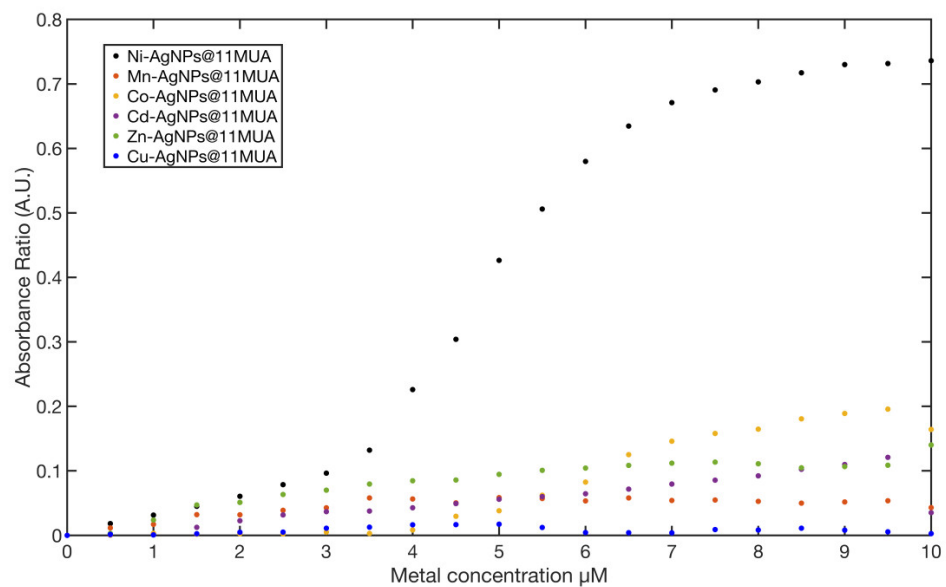

**Figure S2.** Comparison of titration curves of AgNPs@11MUA with increasing concentration of the metal ions of interest.

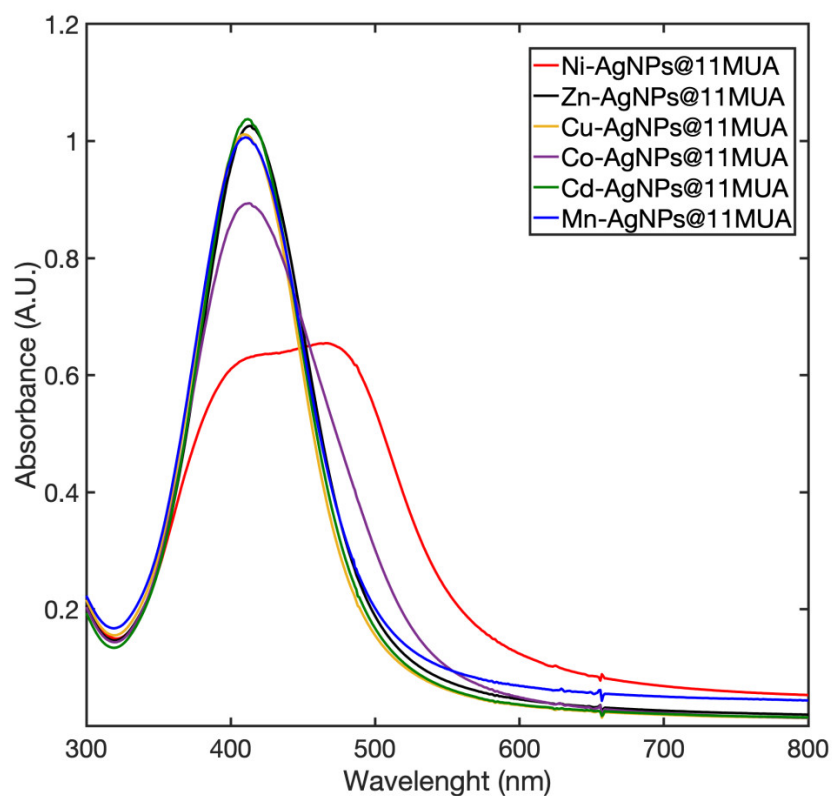

**Figure S3.** UV-VIS spectra of AgNPs@11MUA after addition of 7.5  $\mu\text{M}$  of  $\text{Co}^{2+}$ ,  $\text{Mn}^{2+}$ ,  $\text{Cd}^{2+}$ ,  $\text{Cu}^{2+}$ ,  $\text{Zn}^{2+}$ , and  $\text{Ni}^{2+}$  ions.
